# Requirement for TRanslocon-Associated Protein (TRAP) $\alpha$ in insulin biogenesis

Xin Li<sup>\*1</sup>, Omar A. Itani<sup>\*2,3</sup>, Leena Haataja<sup>2,4</sup>, Kathleen J. Dumas<sup>2,3</sup>, Jing Yang<sup>1</sup>, Jeeyeon Cha<sup>5,8</sup>,  
Stephane Flibotte<sup>9</sup>, Hung-Jen Shih<sup>3</sup>, Jialu Xu<sup>1</sup>, Ling Qi<sup>2,4</sup>, Peter Arvan<sup>2,4</sup>, Ming Liu<sup>#1,2,4</sup>, and  
Patrick J. Hu<sup>#2,3,5,6,7</sup>

<sup>1</sup>Department of Endocrinology and Metabolism, Tianjin Medical University General  
Hospital, Tianjin, China

<sup>2</sup>Departments of Internal Medicine and <sup>3</sup>Cell and Developmental Biology, and <sup>4</sup>Division of  
Metabolism, Endocrinology & Diabetes, University of Michigan Medical School, Ann Arbor,  
MI

<sup>5</sup>Departments of Medicine and <sup>6</sup>Cell and Developmental Biology, <sup>7</sup>Division of Hematology  
and Oncology, and <sup>8</sup>Division of Diabetes, Endocrinology & Metabolism, Vanderbilt  
University Medical Center, Nashville, TN

<sup>9</sup>Department of Zoology and Michael Smith Laboratories, University of British Columbia,  
Vancouver, British Columbia

\*These authors contributed equally to this work

#Co-corresponding authors

The mechanistic basis for the biogenesis of peptide hormones and growth factors is poorly understood. Here we show that the conserved endoplasmic reticulum (ER) membrane translocon-associated protein (TRAP)  $\alpha$ , also known as signal sequence receptor 1 (SSR1)<sup>1</sup>, plays a critical role in the biosynthesis of insulin. A genetic screen in the nematode *Caenorhabditis elegans* revealed *trap-1*, which encodes the *C. elegans* TRAP $\alpha$  ortholog, as a modifier of DAF-2 insulin receptor (InsR) signaling. Genetic analysis indicates that TRAP-1 acts upstream of DAF-2/InsR to control *C. elegans* development. Endogenous *C. elegans* TRAP-1 and mammalian TRAP $\alpha$  both localized to the ER. In pancreatic beta cells, TRAP $\alpha$  deletion impaired preproinsulin translocation but did not affect the synthesis of  $\alpha_1$ -antitrypsin, indicating that TRAP $\alpha$  selectively influences the translocation of a subset of secreted proteins. Surprisingly, loss of TRAP $\alpha$  function also resulted in disruption of distal steps in insulin biogenesis including proinsulin processing and secretion. These results show that TRAP $\alpha$  assists in the ER translocation of preproinsulin and unveil unanticipated additional consequences of TRAP $\alpha$  loss-of-function on the intracellular trafficking and maturation of proinsulin. The association of common intronic single nucleotide variants in the human TRAP $\alpha$  gene with susceptibility to Type 2 diabetes and pancreatic beta cell dysfunction<sup>2</sup> suggests that impairment of preproinsulin translocation and proinsulin trafficking may contribute to the pathogenesis of Type 2 diabetes.

The *C. elegans* DAF-2/InsR pathway prevents dauer diapause through a conserved phosphoinositide 3-kinase (PI3K)/Akt pathway that inhibits the FoxO transcription factor DAF-16. In the context of reduced DAF-2/InsR signaling, cytoplasmic DAF-16/FoxO

translocates to the nucleus and promotes dauer arrest through transcriptional regulation<sup>3,4</sup>. In a genetic screen for suppressors of the dauer-constitutive phenotype of an *eak-7;akt-1* double mutant strain that exhibits reduced DAF-2/InsR signaling and increased DAF-16/FoxO activity<sup>5-8</sup>, we isolated a strain containing a ~3.5 kb deletion, *dpDf665*, that spanned the *trap-1* gene as well as three exons of the upstream gene Y71F9AL.1 (Figure 1A). Three independent *trap-1* null mutations (Figure S1) phenocopied the *dpDf665* deletion (Figure 1B), whereas a null mutation in Y71F9AL.1 did not (Figure S2), indicating that the mutant phenotype is a consequence of *trap-1* deletion. *trap-1* mutation suppressed the dauer-constitutive phenotype of mutants with reduced DAF-2/InsR signaling (Figure 1C) but not the phenotype of mutants with reduced signaling in other pathways that inhibit dauer diapause<sup>3,9</sup> (Figure S3). Furthermore, *trap-1* mutation impaired the induction of DAF-16/FoxO target genes caused by DAF-2/InsR mutation<sup>10</sup> (Figures 1D-F). Thus, TRAP-1 promotes dauer arrest by specifically antagonizing the DAF-2/InsR pathway.

TRAP-1 is orthologous to mammalian TRAP $\alpha$ /SSR1 (henceforth referred to as “TRAP $\alpha$ ”), a transmembrane ER protein identified based on its interaction with the preprolactin signal peptide during *in vitro* protein translocation<sup>1,11</sup> (Figure S4). TRAP $\alpha$  physically associates with three other conserved ER transmembrane proteins (TRAP $\beta$ ,  $\gamma$ , and  $\delta$ ) to form the TRAP complex<sup>12</sup>. A functional single-copy TRAP-1::mCherry fusion protein generated by CRISPR/Cas9-mediated knock-in (Figure 1C) is expressed in several tissues in *C. elegans* embryos, larvae, and adult animals (Figures 2A-C). Coexpression of

TRAP-1::mCherry with the ER protein signal peptidase fused to GFP<sup>13</sup> revealed that endogenous TRAP-1 localizes to the ER (Figure 2D).

Although the biological function of mammalian TRAP $\alpha$  has not been established, it is thought to play a role in cotranslational ER translocation based on its interaction with the prolactin signal peptide *in vitro*<sup>11</sup>, its necessity for the *in vitro* translocation of prion protein<sup>14</sup>, and its physical proximity to the Sec61 protein translocation channel<sup>15-19</sup>. As the expanded *C. elegans* insulin-like gene family encodes 40 peptides, some of which enhance dauer arrest by antagonizing DAF-2/InsR signaling<sup>20,21</sup>, we hypothesized that TRAP-1 influences DAF-2/InsR signaling by promoting the ER-based biosynthesis of one or more of these insulin-like negative regulators of DAF-2/InsR<sup>20</sup>. If this model is correct, then DAF-2/InsR mutations that impair receptor function downstream of ligand binding should be resistant to suppression by *trap-1* mutation, as these mutant DAF-2/InsR receptors would be refractory to changes in ligand-mediated activity caused by *trap-1* mutation. We therefore tested the effect of *trap-1* mutation on the dauer-constitutive phenotype of eight distinct *daf-2/InsR* loss-of-function alleles, seven of which affect amino acid residues that are conserved in the human InsR<sup>22</sup> (Table S1).

Whereas *trap-1* mutation suppressed the dauer-constitutive phenotype of the *daf-2* alleles *e1368* and *m212* (Figure S5A and Table S1), both of which encode receptors with missense mutations in the extracellular ligand-binding domain<sup>22,23</sup>, the dauer-constitutive phenotypes of the other six *daf-2* alleles were not affected by *trap-1* mutation. The functional consequences of four of these six DAF-2/InsR mutations can be inferred from data on human

InsRs with point mutations affecting the corresponding conserved residues (Table S1). A heterozygous mutation in the human InsR kinase domain corresponding to *daf-2(e1391)*<sup>23</sup> was found in a patient with autosomal dominant Type A insulin-resistant diabetes mellitus with acanthosis nigricans (IRAN)<sup>24</sup> and results in a severe reduction in InsR *in vitro* kinase activity and autophosphorylation<sup>25</sup>. Another Type A IRAN patient was found to be homozygous for a missense mutation in the InsR extracellular domain corresponding to *daf-2(m579)*<sup>26</sup> that reduces the affinity of InsR for insulin by three-to-five fold<sup>27</sup>. A missense mutation affecting the conserved residue in the human InsR corresponding to the glycine mutated in *daf-2(m596)* was identified in a patient with insulin resistance and leprechaunism<sup>28</sup> and reduces the amount of InsR present at the plasma membrane by more than 90%<sup>29</sup>. Finally, human InsR harboring a missense mutation affecting the conserved cysteine mutated in *daf-2(m577)*<sup>22</sup> exhibits a 100-fold reduction in levels of mature tetrameric receptor present at the cell surface compared to wild-type human InsR<sup>30</sup>. The failure of *trap-1* mutation to suppress the dauer-constitutive phenotypes of these *daf-2/InsR* alleles (Figure S5A and Table S1) indicates that TRAP-1 acts upstream of DAF-2/InsR and is consistent with a role for TRAP-1 in the biogenesis of insulin-like peptide ligands that antagonize DAF-2/InsR.

To further test the hypothesis that TRAP-1 promotes the biogenesis of antagonistic DAF-2/InsR ligands, we determined the effect of *trap-1* mutation on the dauer-constitutive phenotype of animals with mutations in three genes encoding DAF-2/InsR agonist peptides<sup>21</sup>. *trap-1* mutation partially suppressed the dauer-constitutive phenotype of *ins-4 ins-6;daf-28*

triple mutants (Figure S5B), consistent with a model whereby TRAP-1 promotes antagonist insulin-like peptide ligand action.

As human insulin antagonizes DAF-2/InsR signaling when it is expressed in *C. elegans*<sup>20</sup>, we explored the possibility that mammalian TRAP $\alpha$  promotes insulin biogenesis. Endogenous TRAP $\alpha$  colocalized with KDEL ER resident proteins but not with the Golgi marker GM130<sup>31</sup> in rat INS 832/13 pancreatic beta cells (Figure 3A). To assess the role of TRAP $\alpha$  in preproinsulin translocation, we generated INS 832/13 cells lacking TRAP $\alpha$  using CRISPR/Cas9-based genome editing. Normally, preproinsulin is nearly undetectable by immunoblotting with anti-proinsulin antibodies (Figure 3B, first two lanes), but TRAP $\alpha$  knockout (KO) resulted in detectable amounts of preproinsulin (Figure 3B, third lane) that increased further upon pretreatment of cells with the proteasome inhibitor MG132 (Figure 3B, last lane).

These data could be consistent with a requirement for TRAP $\alpha$  in the translocation of preproinsulin such that in the absence of TRAP $\alpha$ , untranslocated preproinsulin is degraded by the proteasome. Alternatively, the data in Figure 3B could be consistent with impaired preproinsulin processing by signal peptidase in the ER. To distinguish between a translocation defect and a signal peptidase processing defect in TRAP $\alpha$  KO cells, we determined the protease sensitivity of preproinsulin in TRAP $\alpha$  KO cells after selective permeabilization of the plasma membrane (Figure 3C). In wild-type cells, preproinsulin was fully translocated into the ER and processed to proinsulin that was protease-resistant after plasma membrane permeabilization with digitonin but degraded after full solubilization of

internal membranes with Triton X-100 (Figure 3C, third and fourth lanes). In TRAP $\alpha$  KO cells, accumulated preproinsulin was protease-sensitive both after partial as well as complete membrane permeabilization (Figure 3C, seventh and eighth lanes). These data indicate that in TRAP $\alpha$  KO cells, preproinsulin remains untranslocated in the cytosol.

While the steady-state level of proinsulin was not affected by TRAP $\alpha$  KO (Figures 3B and 3C), anti-insulin immunoblotting revealed a surprisingly dramatic reduction in total insulin content in TRAP $\alpha$  KO cells compared to control cells (Figure 3D). TRAP $\alpha$  knockdown by RNAi recapitulated this decrease in steady-state insulin levels (Figure 3E), indicating that this phenotype does not represent an off-target effect of genome editing.

To gain further insight into the role of TRAP $\alpha$  in early events governing insulin biogenesis, we pulse-labeled cells with  $^{35}\text{S}$ -labeled methionine and cysteine ( $^{35}\text{S}$ -Met/Cys) and analyzed insulin biosynthetic intermediates by immunoprecipitation immediately after labeling or after a chase of 60 or 120 minutes (Figures 3F-H). In wild-type cells, proinsulin (PI) was efficiently labeled with  $^{35}\text{S}$ -Met/Cys (Figure 3F, lane 1) and processed into mature insulin (Ins-B; lanes 2 and 4). Additionally, both proinsulin and insulin were secreted into the media (M; lanes 3 and 5). Notably, in wild-type cells, preproinsulin (pPI) was not detected, consistent with its rapid translocation and conversion to proinsulin in the ER. In contrast, in TRAP $\alpha$  KO cells, newly synthesized preproinsulin was detectable immediately after labeling (lane 6) but was lost thereafter. While proinsulin was still synthesized (lane 6), its recovery at 60 and 120 minutes after labeling was diminished (compare lanes 7 and 9 to lane 6), and proinsulin was neither secreted intact nor processed to mature insulin

intracellularly (lanes 7-10). Therefore, in addition to impairing preproinsulin ER translocation, TRAP $\alpha$  KO also results in reduced proinsulin stability, with dramatically decreased insulin biogenesis and secretion.

To elucidate the contribution of the proteasome to increased proinsulin turnover in TRAP $\alpha$  KO cells, we treated <sup>35</sup>S-Met/Cys-labeled cells with the proteasome inhibitor MG132. MG132 treatment increased intracellular proinsulin levels (Figure S6, compare lane 13 to lane 11 and lane 17 to lane 15). However, this increase did not rescue defects in proinsulin secretion and processing to mature insulin. Therefore, TRAP $\alpha$  KO impairs the intracellular trafficking of proinsulin and the biogenesis of insulin independent of its effect on proinsulin turnover.

To determine whether the proinsulin trafficking defect observed in TRAP $\alpha$  KO cells was due to a general defect in the secretory pathway, we analyzed the biogenesis and secretion of  $\alpha$ 1-antitrypsin (AAT) in wild-type and TRAP $\alpha$  KO cells. TRAP $\alpha$  KO affected neither the biogenesis nor the secretion of AAT (Figures 3I-J). These findings indicate that the secretory pathway is functionally intact in TRAP $\alpha$  KO cells and also demonstrate that TRAP $\alpha$  promotes the ER translocation and subsequent trafficking of only a subset of secreted proteins.

We also used immunofluorescence to independently examine the consequences of TRAP $\alpha$  KO on insulin biogenesis. In wild-type cells, insulin (Figure 4A) and proinsulin (Figure 4B) were readily detectable. However, TRAP $\alpha$  KO resulted in a dramatic decrease in insulin content (Figure 4A), although proinsulin was still detectable (Figure 4B).



Reintroducing epitope-tagged TRAP $\alpha$  into TRAP $\alpha$  KO cells rescued insulin production in transfected cells (Figures 4C-D), and infection of TRAP $\alpha$  KO cells with adenovirus encoding TRAP $\alpha$  at increasing multiplicities of infection revealed that this rescue was dose-dependent (Figure S7).

Our finding that TRAP $\alpha$  activity is required for efficient insulin biogenesis and secretion was unexpected. Defects in proinsulin processing and secretion could be an indirect consequence of TRAP $\alpha$  dysfunction in the ER. In mouse fibroblasts, TRAP $\alpha$  physically associates with misfolded ER-associated degradation (ERAD) substrates<sup>32</sup>, suggesting that TRAP $\alpha$  may play a role in reducing ER stress. Thus, in pancreatic beta cells, loss of TRAP $\alpha$  may cause abnormalities in proinsulin processing and secretion (Figures 3F-H) due to a general increase in ER stress.

To determine whether *C. elegans* TRAP-1 and mammalian TRAP $\alpha$  play roles in mitigating ER stress, we assayed for constitutive activation of the unfolded protein response in animals and beta cells lacking TRAP-1 or TRAP $\alpha$ , respectively. In *C. elegans*, transcription of *hsp-4*, which encodes a homolog of the human ER chaperone BiP, is induced by ER stress<sup>33</sup>. Indeed, while green fluorescence was not detectable in wild-type *hsp-4::GFP* reporter animals grown under normal culture conditions, it was readily visualized in *trap-1* mutant animals harboring the same transgene (Figure 4E). Similarly, increased phosphorylation of eIF2 $\alpha$  at serine 51, which is phosphorylated by PERK in response to ER stress<sup>34</sup>, was detected in INS 832/13 cells with reduced TRAP $\alpha$  expression but not in wild-type INS 832/13 cells (Figure 4F). Thus, we cannot exclude the possibility that TRAP $\alpha$  may

indirectly influence distal events in insulin biogenesis through effects on ER stress that are not similarly consequential for  $\alpha$ 1-antitrypsin (Figures 3I-J).

Although the role of ER translocation in governing insulin biogenesis has been underappreciated, hints of its importance have emerged from studies on rare missense mutations in the signal peptide of human preproinsulin that are associated with congenital diabetes<sup>35</sup>. The current work provides insight into the importance of the ER translocation machinery in insulin biogenesis by establishing preproinsulin as the first bonafide client protein for TRAP $\alpha$ . Our data are consistent with a model whereby TRAP $\alpha$  directly promotes preproinsulin translocation and indirectly influences proinsulin maturation and insulin secretion, possibly through its effects on ER stress. Variation in TRAP $\alpha$  expression and/or activity may be generally relevant to the pathogenesis of Type 2 diabetes, as several common intronic single nucleotide variants in the human *Ssr1* gene (encoding TRAP $\alpha$ ) are associated with Type 2 diabetes risk and pancreatic beta cell dysfunction<sup>2</sup>. Intriguingly, genes encoding TRAP subunits are among the most highly upregulated genes in pancreatic beta cells exposed to high glucose concentrations<sup>36</sup>, and the transcriptional induction of TRAP $\alpha$ ,  $\beta$ , and  $\gamma$  in pancreatic beta cells requires the unfolded protein response transducer IRE1 $\alpha$ <sup>37</sup>. Thus, upregulation of TRAP $\alpha$  in pancreatic beta cells in the context of hyperglycemia may promote metabolic stability by both enhancing insulin biogenesis and attenuating ER stress. Understanding the mechanistic basis for TRAP $\alpha$  action in insulin biogenesis may lead to new approaches to prevent and treat Type 2 diabetes.

As mammalian TRAP $\alpha$  is expressed widely<sup>38</sup>, it surely must have biological functions that are distinct from its role in insulin biogenesis. These may include promoting the translocation of other proteins that enter the secretory pathway (such as PrP<sup>14</sup>) and/or participating in ERAD<sup>32</sup>. Mice homozygous for a C-terminal TRAP $\alpha$ -*ShBle-LacZ* fusion allele die perinatally, and homozygous TRAP $\alpha$ -*ShBle-LacZ* embryos are small and have cardiac outflow tract and endocardial cushion defects<sup>38</sup>. Therefore, TRAP $\alpha$  likely plays a role in the translocation of other secreted proteins that play important roles in embryonic development. Defining specific features of translocated proteins that confer TRAP $\alpha$  dependence<sup>14,39</sup> will facilitate the identification of additional TRAP $\alpha$  client proteins and the elucidation of other biological functions of TRAP $\alpha$ .

**Supplementary Information** is linked to the online version of the paper.

**Acknowledgements:** This work was supported by American Heart Association Postdoctoral Fellowship Award 14POST20390031 (O.A.I.); NIH R01DK120047 (L.Q.), R01DK111174 (L.Q., P.A., and M.L.), R01DK048280 (P.A.), and R01DK088856 (M.L.); National Natural Science Foundation of China grants 81070629, 81570699, 81620108004, and 81370895 (M.L.); and NIH R01AG041177, American Cancer Society Research Scholar Grant 119640-RSG-10-132-01-DDC, and American Heart Association Innovative Research Grant 11IRG5170009 (P.J.H.). We acknowledge support from the Michigan Diabetes Research Center Morphology Core (NIH P30 DK020572) and thank Roland Stein for comments on the manuscript.

**Author contributions:** Conceived of the project: O.A.I., P.A., M.L., P.J.H.; performed experiments: X.L., O.A.I., L.H., K.J.D., J.Y., J.C., H.-J.S., J.X.; analyzed data: X.L., O.A.I., L.H., K.J.D., J.C., S.F., H.-J.S., L.Q., P.A., M.L., P.J.H.; wrote the manuscript: P.A., M.L., P.J.H.

**Competing interests:** The authors declare no competing interests.

**Materials and correspondence:** Requests for materials and other correspondence should be addressed to Patrick J. Hu ([patrick.j.hu@vumc.org](mailto:patrick.j.hu@vumc.org)).

# Figure 1

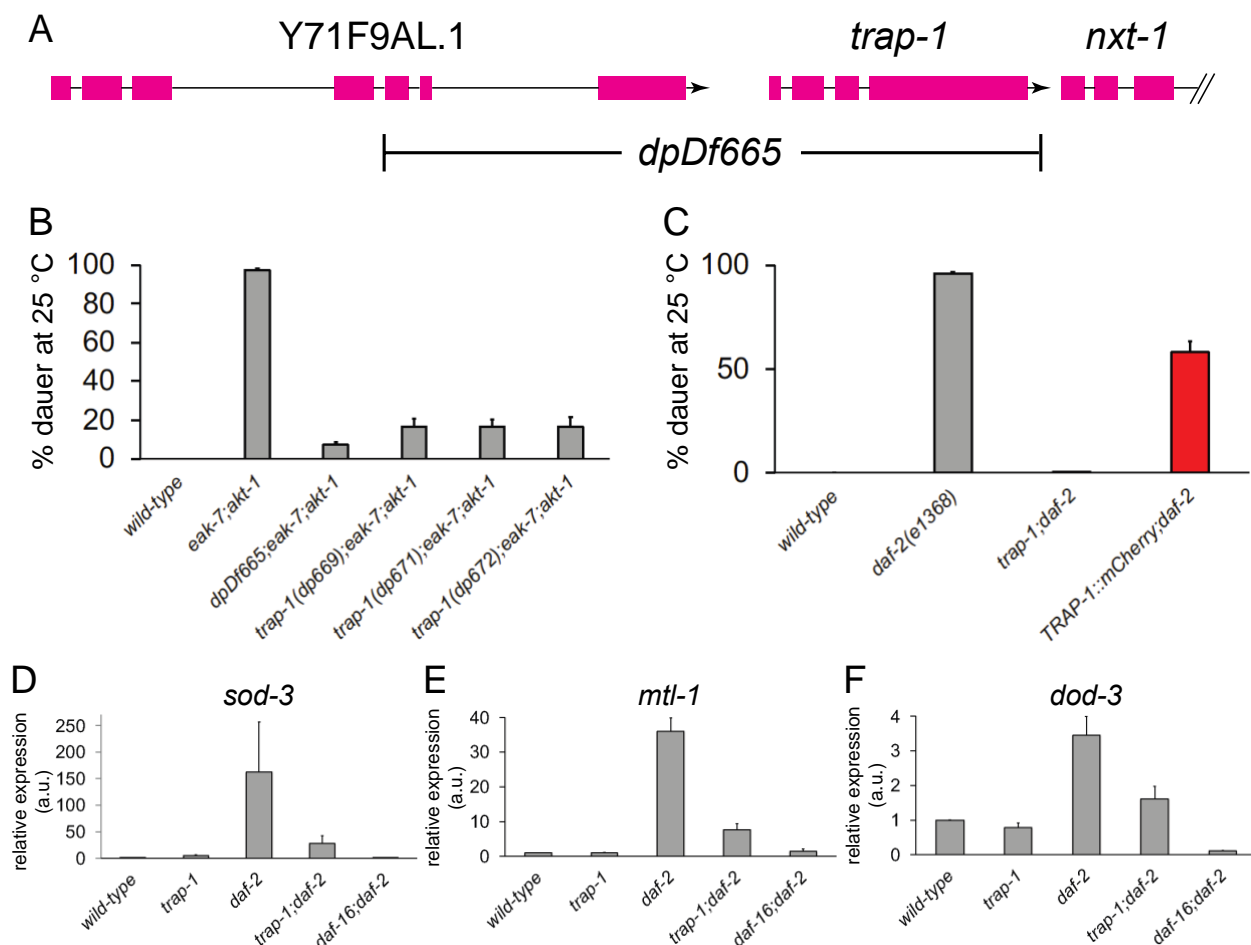

**Figure 1. *trap-1* loss-of-function enhances DAF-2/InsR signaling.** A. Schematic of the *trap-1* genomic region and the *dpDf665* deletion allele identified in a genetic screen. B. *trap-1* null alleles *dp669*, *dp671*, and *dp672* (Figure S1) phenocopy dauer suppression caused by *dpDf665* deletion. C. The *trap-1(dp672)* null mutation suppresses the dauer-constitutive phenotype of a *daf-2/InsR* loss-of-function mutant, and a TRAP-1::mCherry fusion protein is functional. D.-F. The *trap-1(dp672)* null mutation inhibits the expression of the DAF-16/FoxO target genes D. *sod-3*, E. *mtl-1*, and F. *dod-3*. a.u., arbitrary units.

## Figure 2

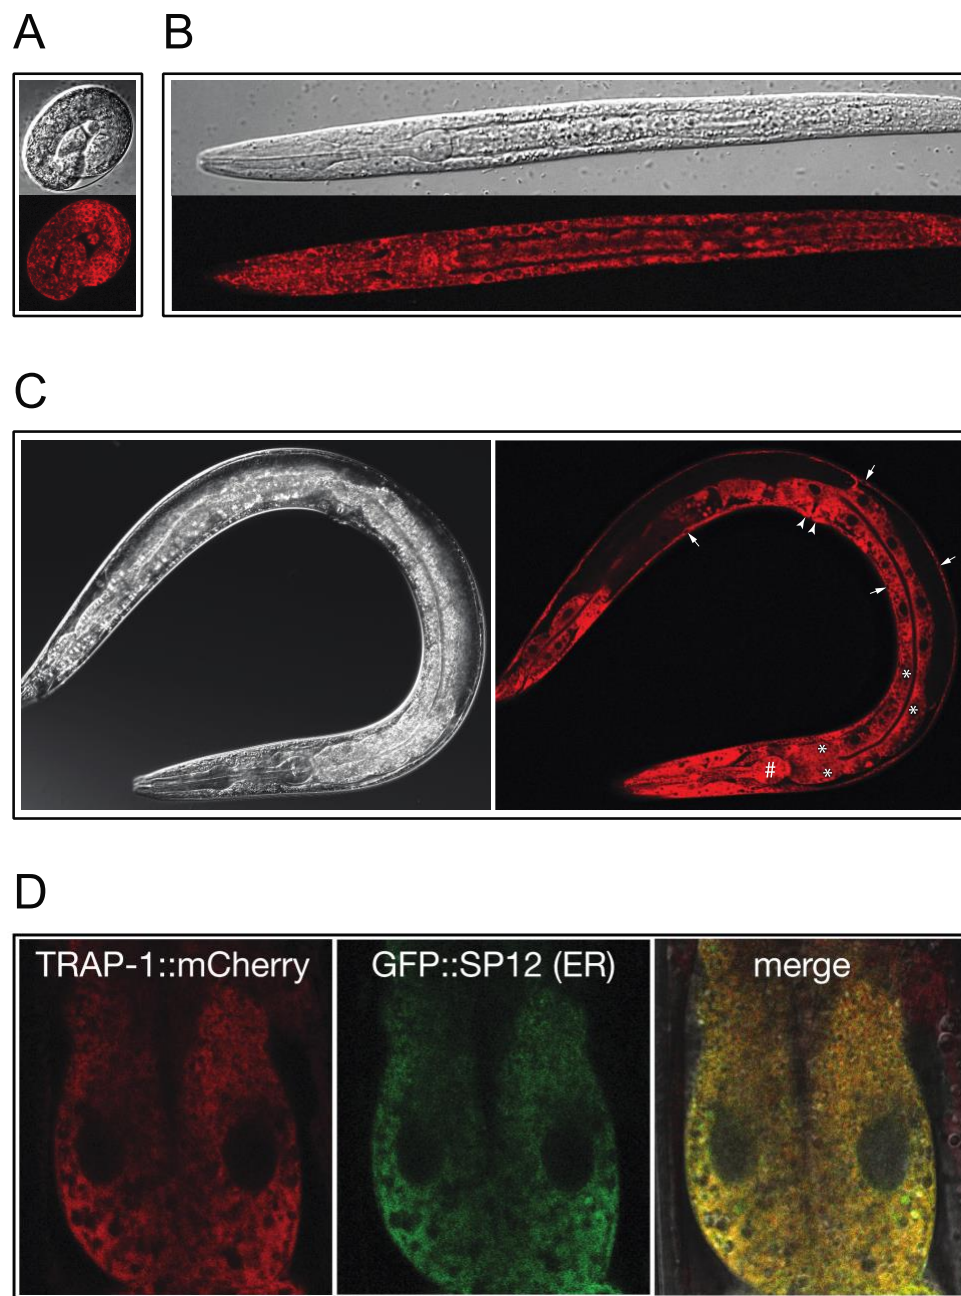

**Figure 2. Spatiotemporal expression of a functional TRAP-1::mCherry fusion protein.** TRAP-1::mCherry is expressed widely in A. embryos, B. larvae, and C. adult animals. Differential interference contrast (upper panel in A. and B., left panel in C.) and fluorescence (lower

256 panel in A. and B., right panel in C.) images are shown of representative animals. In adults  
 257 (C.), TRAP-1::mCherry is expressed in the pharynx (hashtag), intestine (asterisks),  
 258 hypodermis (arrows), and vulva (arrowheads). D. TRAP-1::mCherry colocalizes with the ER  
 259 signal peptidase GFP-SP12. Two anterior intestinal cells are shown.

## Figure 3

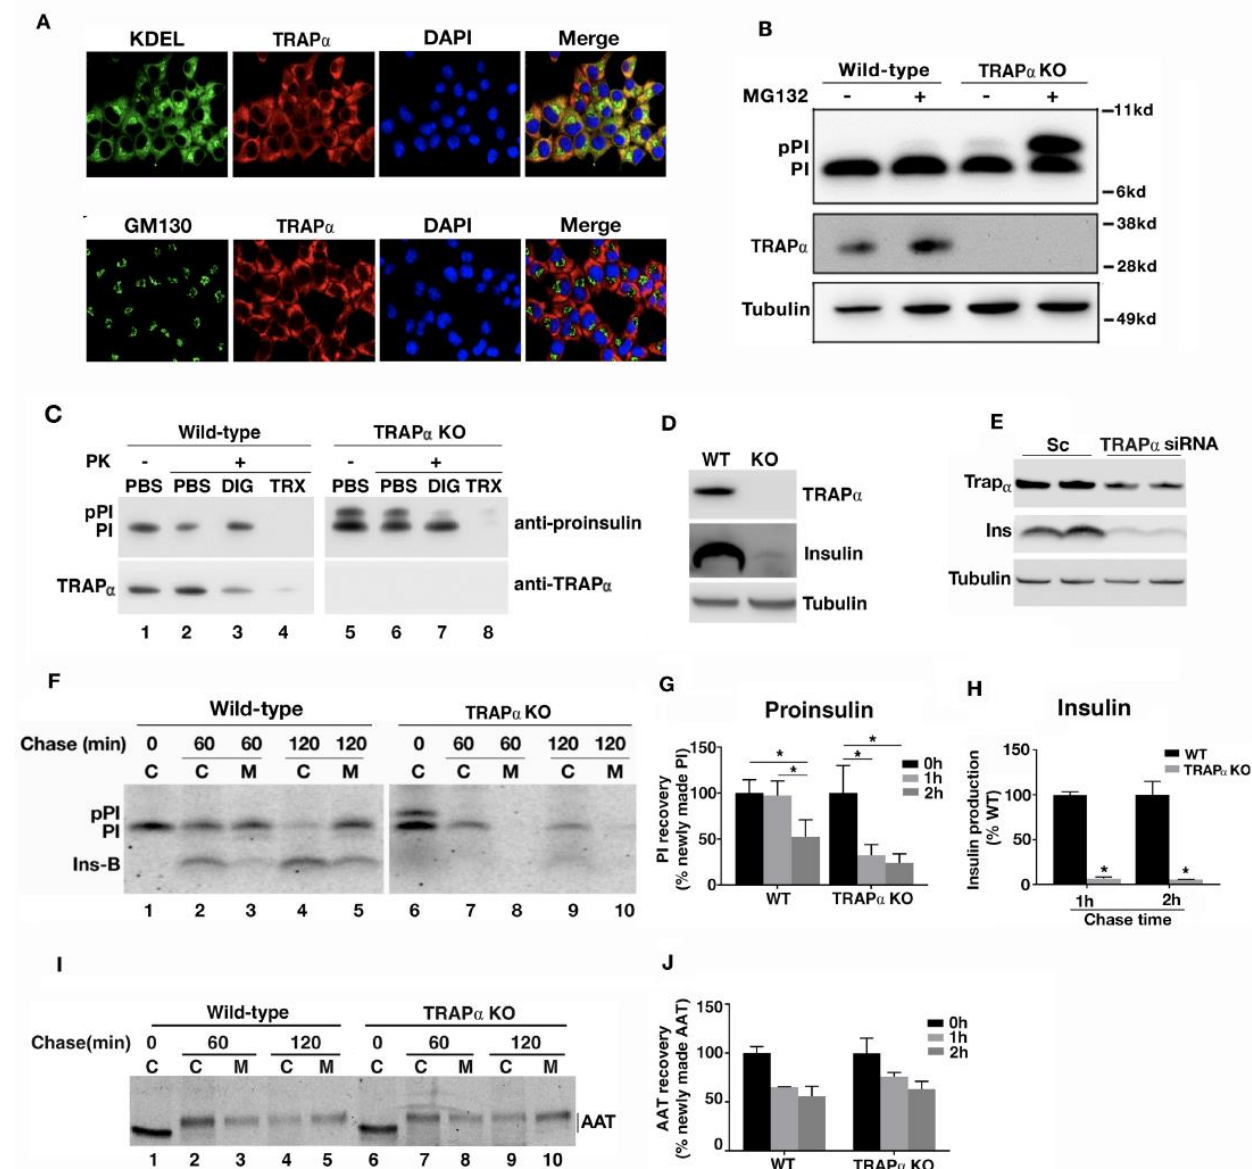

**Figure 3. TRAP $\alpha$  promotes preproinsulin ER translocation, insulin biogenesis, and insulin secretion in INS 832/13 cells.** A. Immunostaining of INS 832/13 cells with anti-TRAP $\alpha$  antibodies reveals colocalization with ER proteins recognized by anti-KDEL antibodies (upper panels) but not with the Golgi protein GM130 (lower panels). Nuclei are stained with



266 DAPI. B. SDS-PAGE and anti-proinsulin immunoblotting of lysates from INS 832/13 wild-  
267 type or TRAP $\alpha$  KO cells. Cells were untreated or treated with the proteasome inhibitor  
268 MG132 as indicated. Abbreviations: pPI, preproinsulin; PI, proinsulin. C. SDS-PAGE and  
269 anti-proinsulin immunoblotting of lysates from INS 832/13 wild-type or TRAP $\alpha$  KO cells  
270 after pretreatment with phosphate-buffered saline (PBS), digitonin (DIG), or Triton X-100  
271 (TRX) and subsequent exposure to Proteinase K (PK). D. SDS-PAGE and anti-insulin  
272 immunoblotting of lysates from INS 832/13 wild-type and TRAP $\alpha$  KO cells. E. SDS-PAGE  
273 and anti-insulin immunoblotting of lysates from INS 832/13 wild-type cells that were  
274 transfected with either scrambled (Sc) or TRAP $\alpha$  siRNAs. Duplicate samples were run. F.  
275 SDS-PAGE of anti-insulin immunoprecipitates of cell lysates (C) or conditioned media (M)  
276 from INS 832/13 wild-type or TRAP $\alpha$  KO cells after pulse-labeling with  $^{35}\text{S}$ -Met/Cys and  
277 chase for the indicated times. Abbreviations: pPI, preproinsulin; PI, proinsulin; Ins-B,  
278 insulin. Quantification of total proinsulin and insulin (C + M) is shown in G. and H.,  
279 respectively. I. SDS-PAGE of anti- $\alpha$ 1-antitrypsin (AAT) immunoprecipitates of cell lysates  
280 (C) or conditioned media (M) from INS 832/13 wild-type or TRAP $\alpha$  KO cells after pulse-  
281 labeling and chase as described for F. INS 832/13 wild-type or TRAP $\alpha$  KO cells were  
282 transfected with a plasmid encoding AAT 48 hours prior to pulse-labeling. J. Quantification  
283 of total AAT (C + M) at the indicated time points.

# Figure 4

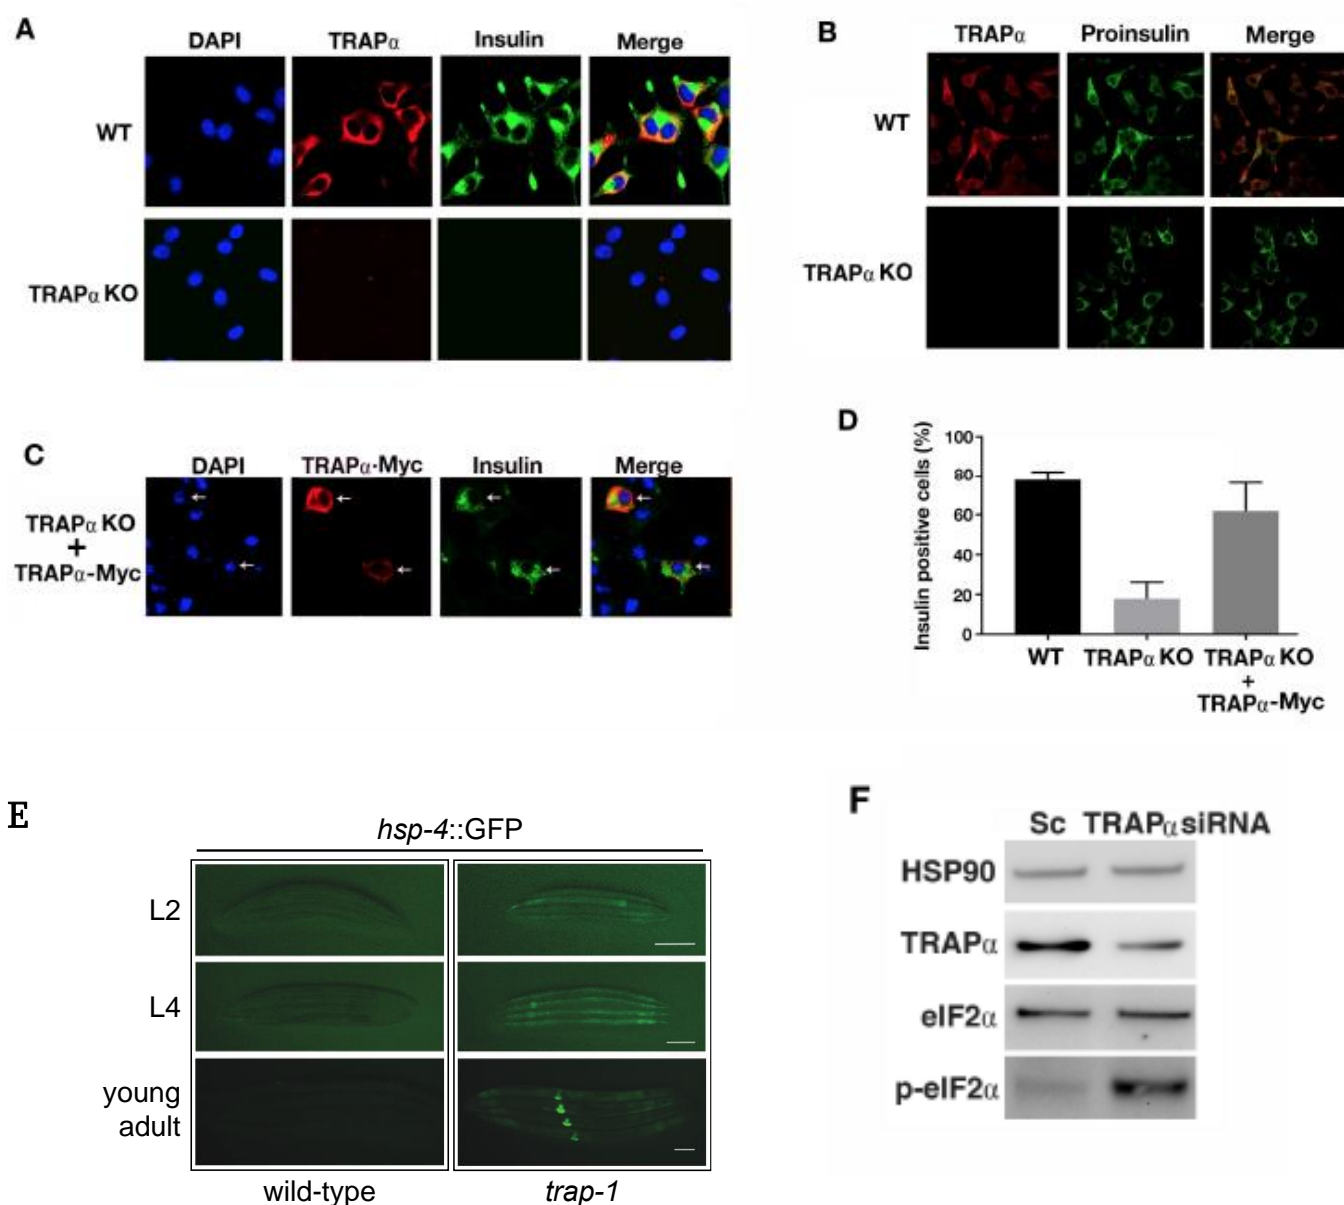

**Figure 4. TRAP $\alpha$  promotes insulin biosynthesis and reduces ER stress.** A. Immunostaining of INS832/13 wild-type (WT) or TRAP $\alpha$  KO cells with anti-TRAP $\alpha$  and A. anti-insulin or B. anti-proinsulin antibodies. Nuclei are stained with DAPI. C. Immunostaining of TRAP $\alpha$  KO

295 cells with anti-Myc and anti-insulin antibodies after transfection with a plasmid encoding a  
 296 Myc-tagged TRAP $\alpha$  cDNA. Nuclei are stained with DAPI. D. Quantification of insulin-  
 297 positive cells in INS832/13 wild-type, TRAP $\alpha$  KO, and TRAP $\alpha$  KO cells expressing  
 298 exogenous Myc-tagged TRAP $\alpha$ . E. Expression of the ER stress reporter *hsp-4::GFP* in second  
 299 (L2) and fourth stage (L4) larvae and young adult wild-type (left panels) and *trap-1(dp672)*  
 300 null mutant (right panels) animals. At each stage, images of wild-type and *trap-1* mutant  
 301 animals were captured with equivalent exposure times. Scale bar: 100 microns. F. SDS-PAGE  
 302 and anti-phospho-Ser51-eIF2 immunoblotting of lysates from INS 832/13 wild-type cells that  
 303 were transfected with either scrambled (Sc) or TRAP $\alpha$  siRNA as indicated.

## REFERENCES

- 1 Prehn, S. *et al.* Structure and biosynthesis of the signal-sequence receptor. *Eur J Biochem* **188**, 439-445 (1990).
- 2 Replication, D. I. G. *et al.* Genome-wide trans-ancestry meta-analysis provides insight into the genetic architecture of type 2 diabetes susceptibility. *Nat Genet* **46**, 234-244, doi:10.1038/ng.2897 (2014).
- 3 Fielenbach, N. & Antebi, A. C. elegans dauer formation and the molecular basis of plasticity. *Genes Dev* **22**, 2149-2165, doi:10.1101/gad.1701508 (2008).
- 4 Murphy, C. T. & Hu, P. J. Insulin/insulin-like growth factor signaling in C. elegans. *WormBook*, 1-43, doi:10.1895/wormbook.1.164.1 (2013).
- 5 Delaney, C. E., Chen, A. T., Graniel, J. V., Dumas, K. J. & Hu, P. J. A histone H4 lysine 20 methyltransferase couples environmental cues to sensory neuron control of developmental plasticity. *Development* **144**, 1273-1282, doi:10.1242/dev.145722 (2017).
- 6 Dumas, K. J. *et al.* Unexpected role for dosage compensation in the control of dauer arrest, insulin-like signaling, and FoxO transcription factor activity in Caenorhabditis elegans. *Genetics* **194**, 619-629, doi:10.1534/genetics.113.149948 (2013).
- 7 Itani, O. A., Flibotte, S., Dumas, K. J., Moerman, D. G. & Hu, P. J. Chromoanasyntetic Genomic Rearrangement Identified in a N-Ethyl-N-Nitrosourea (ENU) Mutagenesis Screen in Caenorhabditis elegans. *G3 (Bethesda)* **6**, 351-356, doi:10.1534/g3.115.024257 (2015).
- 8 Alam, H. *et al.* EAK-7 controls development and life span by regulating nuclear DAF-16/FoxO activity. *Cell Metab* **12**, 30-41, doi:10.1016/j.cmet.2010.05.004 (2010).
- 9 Hu, P. J. Dauer. *WormBook*, 1-19, doi:10.1895/wormbook.1.144.1 (2007).
- 10 Murphy, C. T. *et al.* Genes that act downstream of DAF-16 to influence the lifespan of Caenorhabditis elegans. *Nature* **424**, 277-283, doi:10.1038/nature01789 (2003).
- 11 Wiedmann, M., Kurzchalia, T. V., Hartmann, E. & Rapoport, T. A. A signal sequence receptor in the endoplasmic reticulum membrane. *Nature* **328**, 830-833, doi:10.1038/328830a0 (1987).
- 12 Hartmann, E. *et al.* A tetrameric complex of membrane proteins in the endoplasmic reticulum. *Eur J Biochem* **214**, 375-381 (1993).
- 13 Xu, N. *et al.* The FATP1-DGAT2 complex facilitates lipid droplet expansion at the ER-lipid droplet interface. *J Cell Biol* **198**, 895-911, doi:10.1083/jcb.201201139 (2012).
- 14 Fons, R. D., Bogert, B. A. & Hegde, R. S. Substrate-specific function of the translocon-associated protein complex during translocation across the ER membrane. *J Cell Biol* **160**, 529-539, doi:10.1083/jcb.200210095 (2003).
- 15 Snapp, E. L., Reinhart, G. A., Bogert, B. A., Lippincott-Schwartz, J. & Hegde, R. S. The organization of engaged and quiescent translocons in the endoplasmic reticulum of mammalian cells. *J Cell Biol* **164**, 997-1007, doi:10.1083/jcb.200312079 (2004).
- 16 Pfeffer, S. *et al.* Structure and 3D arrangement of endoplasmic reticulum membrane-associated ribosomes. *Structure* **20**, 1508-1518, doi:10.1016/j.str.2012.06.010 (2012).
- 17 Menetret, J. F. *et al.* Architecture of the ribosome-channel complex derived from native membranes. *J Mol Biol* **348**, 445-457, doi:10.1016/j.jmb.2005.02.053 (2005).

348 18 Menetret, J. F. *et al.* Single copies of Sec61 and TRAP associate with a nontranslating  
349 mammalian ribosome. *Structure* **16**, 1126-1137, doi:10.1016/j.str.2008.05.003 (2008).

350 19 Pfeffer, S. *et al.* Dissecting the molecular organization of the translocon-associated  
351 protein complex. *Nat Commun* **8**, 14516, doi:10.1038/ncomms14516 (2017).

352 20 Pierce, S. B. *et al.* Regulation of DAF-2 receptor signaling by human insulin and ins-1, a  
353 member of the unusually large and diverse C. elegans insulin gene family. *Genes Dev* **15**,  
354 672-686, doi:10.1101/gad.867301 (2001).

355 21 Hung, W. L., Wang, Y., Chitturi, J. & Zhen, M. A Caenorhabditis elegans developmental  
356 decision requires insulin signaling-mediated neuron-intestine communication.  
357 *Development* **141**, 1767-1779, doi:10.1242/dev.103846 (2014).

358 22 Patel, D. S. *et al.* Clustering of genetically defined allele classes in the Caenorhabditis  
359 elegans DAF-2 insulin/IGF-1 receptor. *Genetics* **178**, 931-946,  
360 doi:10.1534/genetics.107.070813 (2008).

361 23 Kimura, K. D., Tissenbaum, H. A., Liu, Y. & Ruvkun, G. daf-2, an insulin receptor-like gene  
362 that regulates longevity and diapause in Caenorhabditis elegans. *Science* **277**, 942-946  
363 (1997).

364 24 Krook, A. *et al.* Molecular scanning of the insulin receptor gene in syndromes of insulin  
365 resistance. *Diabetes* **43**, 357-368 (1994).

366 25 Krook, A., Moller, D. E., Dib, K. & O'Rahilly, S. Two naturally occurring mutant insulin  
367 receptors phosphorylate insulin receptor substrate-1 (IRS-1) but fail to mediate the  
368 biological effects of insulin. Evidence that IRS-1 phosphorylation is not sufficient for  
369 normal insulin action. *J Biol Chem* **271**, 7134-7140 (1996).

370 26 Scott, B. A., Avidan, M. S. & Crowder, C. M. Regulation of hypoxic death in C. elegans by  
371 the insulin/IGF receptor homolog DAF-2. *Science* **296**, 2388-2391,  
372 doi:10.1126/science.1072302 (2002).

373 27 Hamer, I. *et al.* An arginine to cysteine(252) mutation in insulin receptors from a patient  
374 with severe insulin resistance inhibits receptor internalisation but preserves signalling  
375 events. *Diabetologia* **45**, 657-667, doi:10.1007/s00125-002-0798-5 (2002).

376 28 Barbetti, F. *et al.* Detection of mutations in insulin receptor gene by denaturing gradient  
377 gel electrophoresis. *Diabetes* **41**, 408-415 (1992).

378 29 Wertheimer, E., Barbetti, F., Muggeo, M., Roth, J. & Taylor, S. I. Two mutations in a  
379 conserved structural motif in the insulin receptor inhibit normal folding and intracellular  
380 transport of the receptor. *J Biol Chem* **269**, 7587-7592 (1994).

381 30 Maggi, D. & Cordera, R. Cys 786 and Cys 776 in the posttranslational processing of the  
382 insulin and IGF-I receptors. *Biochem Biophys Res Commun* **280**, 836-841,  
383 doi:10.1006/bbrc.2000.4224 (2001).

384 31 Nakamura, N. *et al.* Characterization of a cis-Golgi matrix protein, GM130. *J Cell Biol* **131**,  
385 1715-1726 (1995).

386 32 Nagasawa, K., Higashi, T., Hosokawa, N., Kaufman, R. J. & Nagata, K. Simultaneous  
387 induction of the four subunits of the TRAP complex by ER stress accelerates ER  
388 degradation. *EMBO Rep* **8**, 483-489, doi:10.1038/sj.embor.7400933 (2007).

389 33 Calfon, M. *et al.* IRE1 couples endoplasmic reticulum load to secretory capacity by  
390 processing the XBP-1 mRNA. *Nature* **415**, 92-96, doi:10.1038/415092a (2002).

- 34 Harding, H. P., Zhang, Y. & Ron, D. Protein translation and folding are coupled by an endoplasmic-reticulum-resident kinase. *Nature* **397**, 271-274, doi:10.1038/16729 (1999).
- 35 Liu, M. *et al.* Proinsulin misfolding and diabetes: mutant INS gene-induced diabetes of youth. *Trends Endocrinol Metab* **21**, 652-659, doi:10.1016/j.tem.2010.07.001 (2010).
- 36 Webb, G. C., Akbar, M. S., Zhao, C. & Steiner, D. F. Expression profiling of pancreatic beta cells: glucose regulation of secretory and metabolic pathway genes. *Proc Natl Acad Sci U S A* **97**, 5773-5778, doi:10.1073/pnas.100126597 (2000).
- 37 Hassler, J. R. *et al.* The IRE1alpha/XBP1s Pathway Is Essential for the Glucose Response and Protection of beta Cells. *PLoS Biol* **13**, e1002277, doi:10.1371/journal.pbio.1002277 (2015).
- 38 Mesbah, K., Camus, A., Babinet, C. & Barra, J. Mutation in the Trapalpha/Ssr1 gene, encoding translocon-associated protein alpha, results in outflow tract morphogenetic defects. *Mol Cell Biol* **26**, 7760-7771, doi:10.1128/MCB.00913-06 (2006).
- 39 Nguyen, D. *et al.* Proteomics reveals signal peptide features determining the client specificity in human TRAP-dependent ER protein import. *Nat Commun* **9**, 3765, doi:10.1038/s41467-018-06188-z (2018).
- 40 Gems, D. *et al.* Two pleiotropic classes of daf-2 mutation affect larval arrest, adult behavior, reproduction and longevity in *Caenorhabditis elegans*. *Genetics* **150**, 129-155 (1998).

## METHODS

**Generation and maintenance of *C. elegans* strains:** Strains were maintained on standard nematode growth media (NGM) plates seeded with *Escherichia coli* OP50. Double and triple mutant strains were constructed using conventional methods. *trap-1* mutant alleles were generated using CRISPR/Cas9-based genome editing<sup>1</sup>. Two guide RNAs complementary to sequences in exon 2 were used. Molecular analysis of *trap-1* mutants is described in Figure S1. DNA encoding a mCherry epitope tag was inserted in-frame at the 3' end of the *trap-1* open reading frame using CRISPR/Cas9-based homology-directed genome editing as described<sup>2</sup>. Red fluorescent animals were isolated, and the mCherry insertion was verified by Sanger sequencing of PCR products spanning the insertion site.

**Genetic screen for modifiers of *C. elegans* DAF-2/InsR signaling:** The suppressor of *eak-7;akt-1* (*seak*) screen was performed by mutagenizing *eak-7;akt-1* double mutants with *N*-ethyl-*N*-nitrosourea (ENU) and screening for rare animals in the F<sub>2</sub> generation that did not arrest as dauers as described<sup>3</sup>. Genomic DNA isolated from *eak-7;akt-1* suppressor strains was sequenced and analyzed as described<sup>3</sup>.

**Dauer arrest assays:** Dauer arrest assays were performed at 25°C as previously described<sup>4</sup>.

**Real-time quantitative PCR (qPCR):** qPCR was performed as previously described<sup>5</sup>.



433

434 ***C. elegans* fluorescence microscopy:** Animals were mounted on slides layered with a thin 3%

435 agarose pad containing 25 mM sodium azide. Images were captured on a Leica inverted SP5

436 X inverted confocal microscope using LAS AF software (Leica).

437

438 **Reagents:** Rat monoclonal anti-KDEL and rabbit monoclonal anti-GM130 antibodies were

439 from Abcam (ab50601 and ab52649, respectively). Rabbit polyclonal anti-TRAP $\alpha$  antibodies

440 were from Novus Biologicals (NBP1-86912). A mouse monoclonal antibody that recognizes a

441 human proinsulin C-peptide—A-chain junction peptide (GSLQKRGIVE) was raised by

442 Abmart. Mouse monoclonal anti-tubulin antibodies were from Sigma (T5168). Guinea pig

443 polyclonal anti-porcine insulin antibodies were from Millipore. Rabbit polyclonal anti- $\alpha$ 1-

444 antitrypsin (AAT) antibodies were from Dako (A001202-2). Rabbit polyclonal anti-HSP90

445 (#4874S), anti-eIF2 (#9722S), and anti-phospho-Ser51 eIF2 antibodies (#9721) were from Cell

446 Signaling.  $^{35}$ S-Met/Cys was from ICN. Dithiothreitol (DTT), protein A-agarose, digitonin, N-

447 ethylmaleimide (NEM), and other chemical reagents were from Sigma-Aldrich. 4-12%

448 gradient SDS-polyacrylamide gel electrophoresis (SDS-PAGE) was performed using NuPage

449 gels from Thermo Fisher. Met/Cys-deficient Dulbecco's modified Eagle's medium (DMEM)

450 and all other tissue culture reagents were from Invitrogen. A cDNA encoding Myc epitope-

451 tagged human TRAP $\alpha$  was synthesized by Integrated DNA Technologies (IDT) and was

452 subcloned into the pTarget mammalian expressing vector (Promega).



**Manipulating TRAP $\alpha$  expression in INS832/13 cells:** INS832/13 cells lacking TRAP $\alpha$  were generated using CRISPR/Cas9-mediated genome editing<sup>6</sup>. Single guide RNAs (sgRNAs) were designed using guide design resources available on the Zhang Lab web site (<https://zlab.bio/guide-design-resources>). Oligonucleotides corresponding to 5' - CACCGTCTGCACTCGGTGAAGCTTC - 3' 20-nt guide sequences were annealed and ligated into pSpCas9(BB)-2A-Puro (PX462) v2.0 vector as described<sup>6</sup>. This plasmid was transfected into INS832/13 cells using Lipofectamine 2000 (Thermo Fisher). 48 hours after transfection, cells were plated and cultured with RPMI growth medium containing 1  $\mu$ g/ml puromycin. Puromycin-resistant clones were screened for loss of TRAP $\alpha$  ("TRAP $\alpha$  KO") by immunoblotting with anti-TRAP $\alpha$  antibodies. To re-express TRAP $\alpha$ , TRAP $\alpha$  KO cells were transiently transfected with a plasmid encoding Myc-tagged human TRAP $\alpha$ . 48 hours after transfection, insulin content was assayed by immunofluorescence. To reduce TRAP $\alpha$  expression by RNAi, INS832/13 cells were transfected with 20nM TRAP $\alpha$  targeting siRNA (Assay ID 219062, Thermo Fisher) or Negative Control siRNA (AM4611, Thermo Fisher) using Lipofectamine RNAiMAX (Invitrogen). 48 hours after transfection, knockdown efficiency was evaluated by immunoblotting using anti-TRAP $\alpha$  antibodies.

**Cell culture:** Cells were plated into 6-well plates one day before transfection. A total of 2  $\mu$ g plasmid DNA was transfected using Lipofectamine 2000 (Invitrogen). For metabolic labeling, cells were pulse-labeled with <sup>35</sup>S-Met/Cys for 15 minutes, washed, and chased with label-free media for 0, 60, or 120 minutes as indicated. Immediately thereafter, media and cell lysate

were immunoprecipitated with anti-insulin or anti-AAT antibodies, and immunoprecipitates were subjected to 4-12% gradient SDS-PAGE under reducing conditions. Preproinsulin, proinsulin, insulin, and AAT were analyzed using a Typhoon Phosphorimager (GE Healthcare). Band intensities were quantified using NIH ImageJ. For selective plasma membrane permeabilization and Proteinase K digestion, cells were incubated on ice with phosphate-buffered saline (PBS), with or without 10 µg/ml Proteinase K, 0.01% digitonin, or 1% Triton X-100 as indicated for 30 minutes. Cells were harvested, boiled in SDS sample buffer, and analyzed by immunoblotting with anti-proinsulin antibodies.

**Immunofluorescence:** Cells were permeabilized with 0.5% Triton X-100, fixed with formaldehyde, blocked, and incubated with anti-TRAP $\alpha$ , anti-KDEL, anti-GM130, anti-insulin, anti-proinsulin, or anti-Myc antibodies. After incubation with fluorophore-conjugated secondary antibodies, specimens were imaged with an Olympus FV500 confocal microscope.

**Immunoblotting:** Cell lysates were boiled in sample buffer containing 100 mM DTT for five minutes, resolved by 4–12% gradient SDS-PAGE, and transferred to nitrocellulose. Primary antibodies were used at 1:1000 dilution in TBST (0.1% Tween 20) plus 5% bovine serum albumin, with the exception of anti-HSP90, which was used at 1:2000 dilution. Secondary antibodies [goat anti-rabbit IgG HRP, goat anti-mouse IgG HRP (both from Biorad), and goat anti-guinea pig IgG HRP (Jackson ImmunoResearch)] were used at 1:5000 dilution. Imaging

was performed after incubation with Clarity Western ECL Substrate (Bio-Rad #1705061) according to the manufacturer's instructions.

**Statistical analyses:** Statistical analyses were carried out by Student's t-test or one-way ANOVA using GraphPad Prism 7.

***hsp-4p::GFP reporter assay:*** Wild-type and *trap-1* mutant *C. elegans* harboring an integrated *hsp-4p::GFP* transgene<sup>7</sup> were harvested, incubated in alkaline hypochlorite [500 mM NaOH and 1.2% (v/v) hypochlorite], and vortexed to isolate eggs. Eggs were washed two times with M9 buffer solution and incubated at 20°C on standard NGM plates seeded with *E. coli* OP50. Animals were imaged at L2 larval, L4 larval, and young adult stages on a Leica SP5 X confocal microscope equipped with LAS AF software. Three experimental replicates yielded similar results.

**Data availability:** The data that support the findings of this study are available from the corresponding author upon reasonable request.

# 511 REFERENCES

- 512 1 Friedland, A. E. *et al.* Heritable genome editing in *C. elegans* via a CRISPR-Cas9  
513 system. *Nat Methods* **10**, 741-743, doi:10.1038/nmeth.2532 (2013).
- 514 2 Paix, A., Folkmann, A., Rasoloson, D. & Seydoux, G. High Efficiency, Homology-  
515 Directed Genome Editing in *Caenorhabditis elegans* Using CRISPR-Cas9  
516 Ribonucleoprotein Complexes. *Genetics* **201**, 47-54, doi:10.1534/genetics.115.179382  
517 (2015).
- 518 3 Dumas, K. J. *et al.* Unexpected role for dosage compensation in the control of dauer  
519 arrest, insulin-like signaling, and FoxO transcription factor activity in *Caenorhabditis*  
520 *elegans*. *Genetics* **194**, 619-629, doi:10.1534/genetics.113.149948 (2013).
- 521 4 Hu, P. J., Xu, J. & Ruvkun, G. Two membrane-associated tyrosine phosphatase  
522 homologs potentiate *C. elegans* AKT-1/PKB signaling. *PLoS Genet* **2**, e99,  
523 doi:10.1371/journal.pgen.0020099 (2006).
- 524 5 Chen, A. T. *et al.* Longevity Genes Revealed by Integrative Analysis of Isoform-  
525 Specific *daf-16/FoxO* Mutants of *Caenorhabditis elegans*. *Genetics* **201**, 613-629,  
526 doi:10.1534/genetics.115.177998 (2015).
- 527 6 Ran, F. A. *et al.* Genome engineering using the CRISPR-Cas9 system. *Nat Protoc* **8**,  
528 2281-2308, doi:10.1038/nprot.2013.143 (2013).
- 529 7 Calfon, M. *et al.* IRE1 couples endoplasmic reticulum load to secretory capacity by  
530 processing the XBP-1 mRNA. *Nature* **415**, 92-96, doi:10.1038/415092a (2002).
